# Supplementary material for: Translation and psychometric properties of the Chinese version of the Artificial Intelligence Attitude Scale for Nurses (AIASN): a cross-sectional study
Source: Research Square preprint supplement (doi:10.21203/rs.3.rs-6836319/v1), 2025-06-10
Supplement: Supplementary file 1 [file 70b11809740fcedf5892d975.docx]

**Chinese version of the Artificial Intelligence Attitude Scale for Nurses**

**(AIASN)**

| **No.** | **Items** | **Strongly disagree** | **Disagree** | **Neutral** | **Agree** | **Strongly agree** |
| --- | --- | --- | --- | --- | --- | --- |
| **Nursing Care and Organization** | | | | | | |
| **1** | The use of AI in nursing practices improves the quality of patient care |  |  |  |  |  |
| **2** | AI can support nurses’ clinical decision-making processes |  |  |  |  |  |
| **3** | AI can enable nurses to quickly analyze complex data for clinical decisions, thereby reducing the risk of errors. |  |  |  |  |  |
| **6** | AI facilitates the development of personalized care plans for patients |  |  |  |  |  |
| **7** | AI reduces nurses’ workload |  |  |  |  |  |
| **8** | AI assists nurses in monitoring patients |  |  |  |  |  |
| **9** | AI enables the coordination of patient care |  |  |  |  |  |
| **10** | The application of AI is expected to potentially take over nurses’ indirect patient care tasks (e.g., supplying medications and supplies, scanning barcodes, answering phones, etc.) |  |  |  |  |  |
| **11** | AI enables nurses to allocate more time to direct patient care activities (e.g., administering injections, oral care, etc.). |  |  |  |  |  |
| **12** | The application of AI in nursing education in clinical and academic settings is useful. |  |  |  |  |  |
| **15** | AI facilitates decision-making processes by strengthening proactive data management within healthcare institutions. |  |  |  |  |  |
| **16** | AI improves the operational efficiency of healthcare institutions |  |  |  |  |  |
| **17** | AI enables healthcare institutions to adapt their activities in response to changing circumstances. |  |  |  |  |  |
| **18** | The integration of AI into healthcare institutions is expected to improve the efficiency of nurses. |  |  |  |  |  |
| **19** | AI increases the efficiency of innovation in healthcare institutions |  |  |  |  |  |
| **20** | The application of AI contribute to more cost-effective healthcare services |  |  |  |  |  |
| **Ethics** | | | | | | |
| **5** | AI may lead to errors in clinical decision-making |  |  |  |  |  |
| **21** | AI systems may contribute to ethical concerns |  |  |  |  |  |
| **22** | AI systems may pose a threat to data security in healthcare institutions |  |  |  |  |  |
| **23** | AI systems may violate patient privacy |  |  |  |  |  |
| **24** | Program vulnerabilities within AI systems have the potential to harm patients |  |  |  |  |  |
| **25** | AI systems cannot assume legal liability or be held accountable to individuals |  |  |  |  |  |
| **26** | The absence or inadequacy of laws and regulations related to AI systems may jeopardize the integrity of the healthcare service system. |  |  |  |  |  |
| **Artificial Intelligence Readiness** | | | | | | |
| **27** | I have a basic understanding of AI technology |  |  |  |  |  |
| **28** | I am informed about the application of AI in the healthcare/nursing field. |  |  |  |  |  |
| **30** | The nursing education I received at the hospital/university prepared me well for using AI technology |  |  |  |  |  |
| **31** | I feel well prepared to integrate AI into the nursing practices at my workplace/internship site |  |  |  |  |  |
| **32** | I have the ability to effectively use AI technology |  |  |  |  |  |
